# Supplementary material for: Timed Creatinine Clearance and Measured Glomerular Filtration Rate in Living Kidney Donors
Source: PubMed Central journal article supplement — Kidney Med. 2022 Nov 17;5(1):100572. doi: 10.1016/j.xkme.2022.100572 (PMC9881214; doi:10.1016/j.xkme.2022.100572), 2022-11-17
Supplement: mmc1.pdf [file mmc1.pdf]

**Figure S1.** Bias of 24-hour timed creatinine clearance ( $CrCl_{24}$ ) versus weight-indexed 24-hour creatinine excretion.

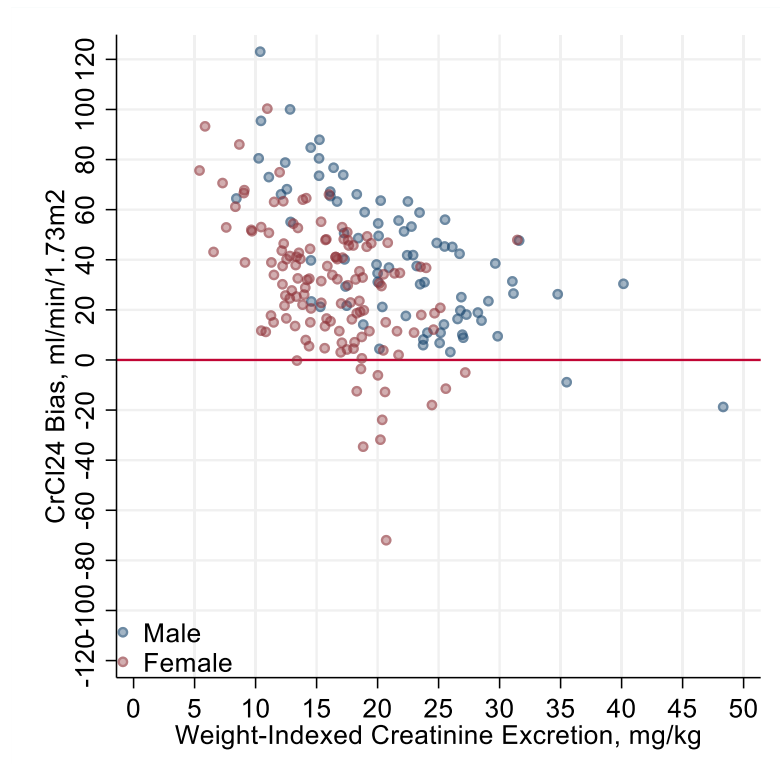

**Figure S2.** Absolute value of the bias of 24-hour timed creatinine clearance ( $\text{CrCl}_{24}$ ) versus the absolute difference between the 24-hour timed creatinine clearance and the estimated glomerular filtration rate based on the 2021 CKD-EPI creatinine-cystatin C equation ( $\text{eGFR}_{\text{CrCys}}$ ). The absolute bias of  $\text{CrCl}_{24}$  remained high even when  $\text{CrCl}_{24}$  and  $\text{eGFR}_{\text{CrCys}}$  were similar, with a median bias of 22.1 among candidates with  $\text{eGFR}_{\text{CrCys}}$  within 20 ml/min/1.73m<sup>2</sup> of  $\text{CrCl}_{24}$ .

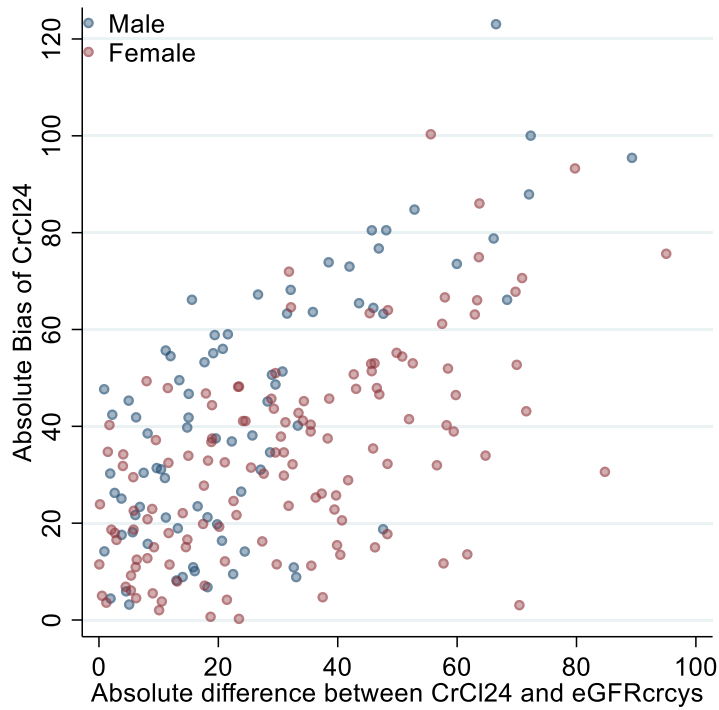

## **Item S1. Supplementary Methods**

We excluded 70 donors from the analysis: 31 donor candidates with no CrCl<sub>24</sub> performed, 2 candidates with biologically implausible CrCl<sub>24</sub> of 209 and 650 ml/min/1.73m<sup>2</sup>, and 34 donor candidates without cystatin C measured. Informed consent was not required for this retrospective study. Analyses were performed using StataMP 17 (StataCorp, College Station, TX).

### *Kidney Function Assessment Referral*

During the study period, all candidates evaluated for living kidney donation initially had their kidney function assessed using both 24-hour timed creatinine clearance (CrCl<sub>24</sub>) and creatinine-based estimated glomerular filtration rate (eGFR) (calculated using the CKD-EPI 2009 equation at that time). Candidates with eGFR or CrCl<sub>24</sub> were <90mL/min/1.73m<sup>2</sup> were referred for further GFR assessment, which consisted of iothalamate clearance testing and measurement of serum creatinine and cystatin C to calculate eGFR<sub>crcys</sub>.

### *Measured GFR assessment*

Cold iothalamate clearance was calculated to determine "measured" GFR (mGFR). 1.5mL of iothalamate (Conray® 60; Guerbet) was administered intravenously, and the syringe was weighed before and after injection to determine the exact delivered dose. Serum iothalamate concentration was measured via high-performance liquid chromatography at 120, 180, 240, and 360 minutes after iothalamate injection.

**Table S1.** Reclassification of glomerular filtrate rate (GFR) based donor eligibility using measured GFR\* versus timed creatinine clearance.\*

| <i>n (table %)</i>                     | <b>Measured<br/>GFR &lt;80</b> | <b>Measured<br/>GFR ≥80</b> |
|----------------------------------------|--------------------------------|-----------------------------|
| <b>Creatinine<br/>clearance &lt;80</b> | 12 (6)                         | 115 (54)                    |
| <b>Creatinine<br/>clearance ≥80</b>    | 4 (2)                          | 81 (38)                     |

\*Kidney function assessment units are ml/min/1.73m<sup>2</sup>
